# Supplementary material for: IR and Raman assignments for zinc phthalocyanine from DFT calculations
Source: Royal Society of Chemistry journal article supplement (doi:10.1039/b005091l), 2000-01-01
Supplement: figures.doc [file figures.doc]

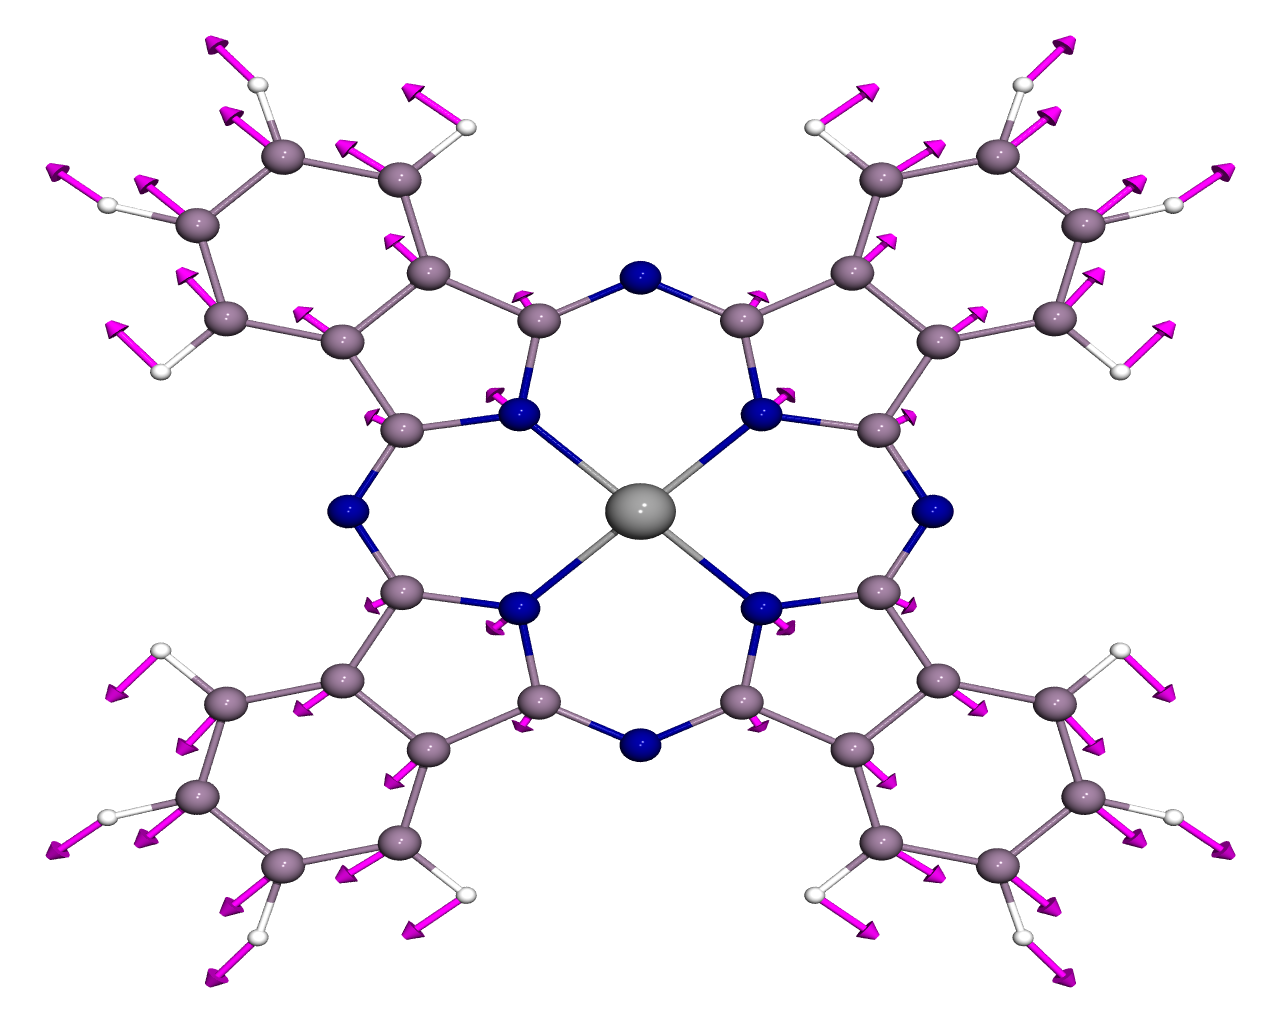


**252 cm‑1**


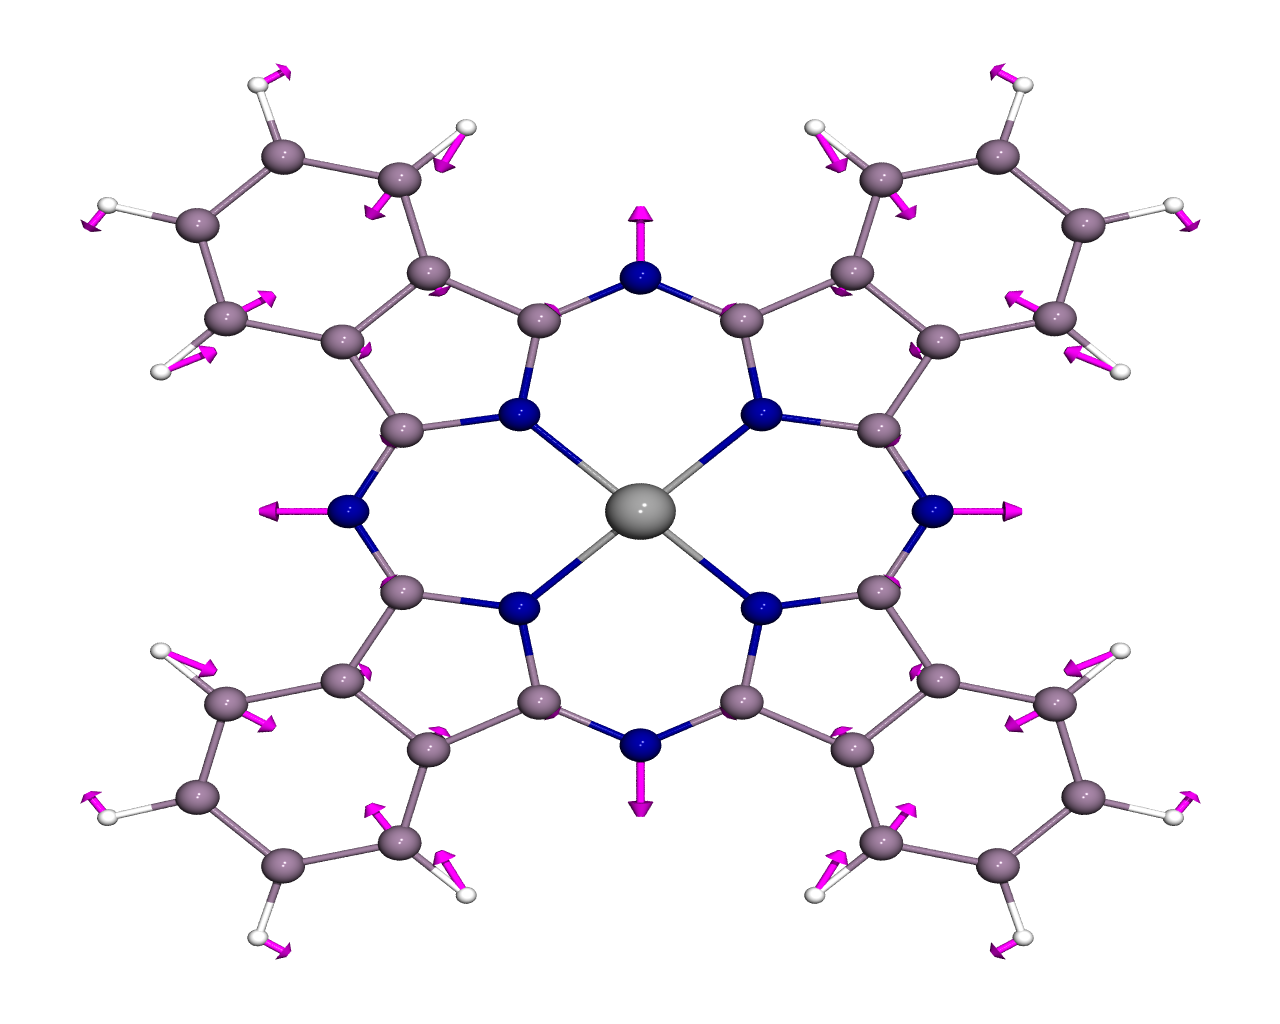


**666 cm‑1**

**Figure S1 Vector diagrams for the major A1 vibrations of zinc phthalocyanine.**

**
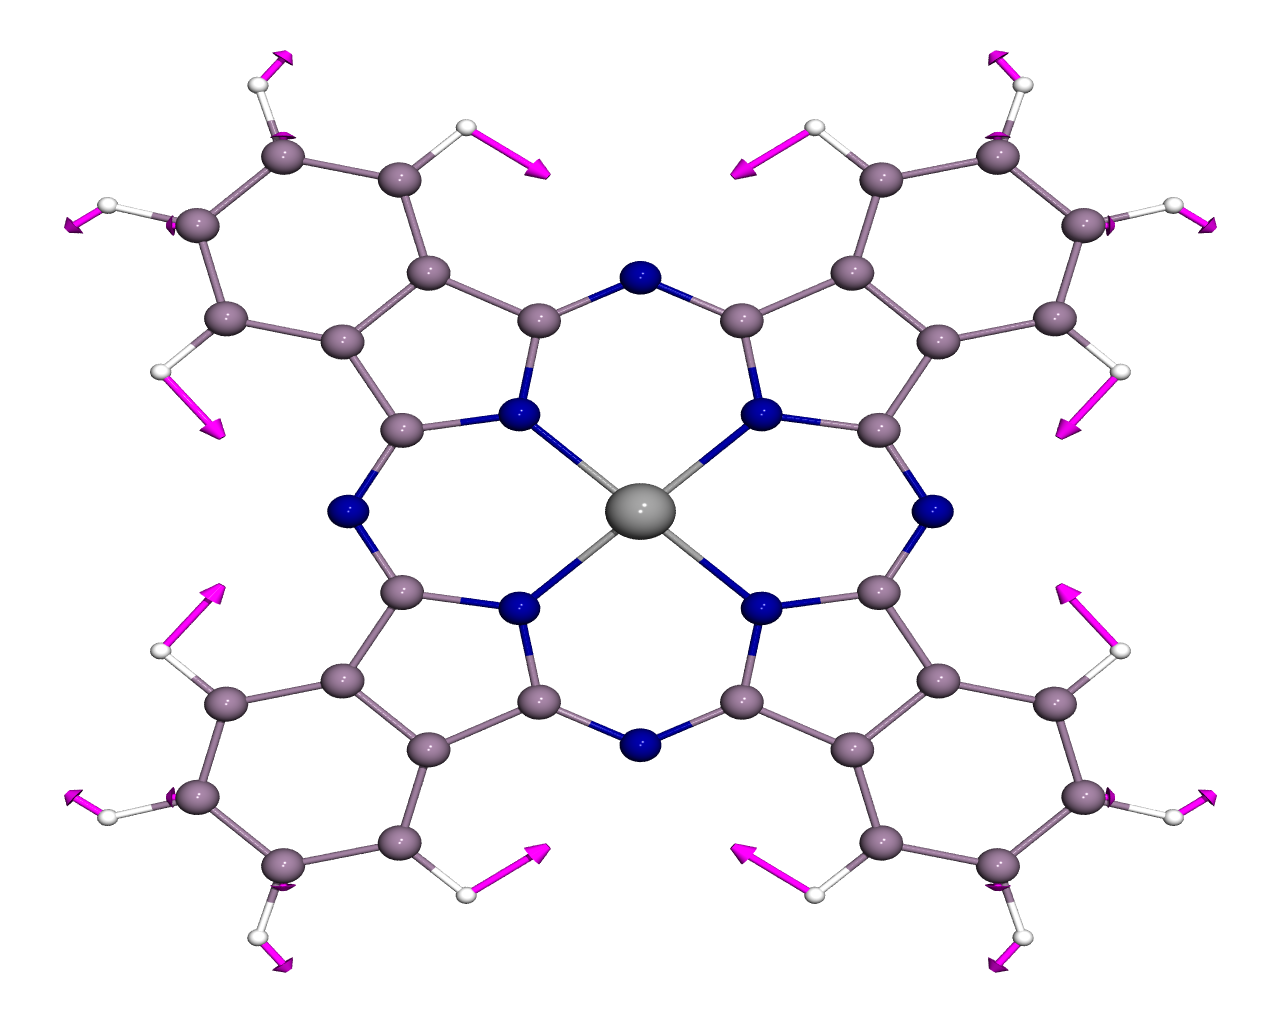
**

**1005 cm‑1**

**
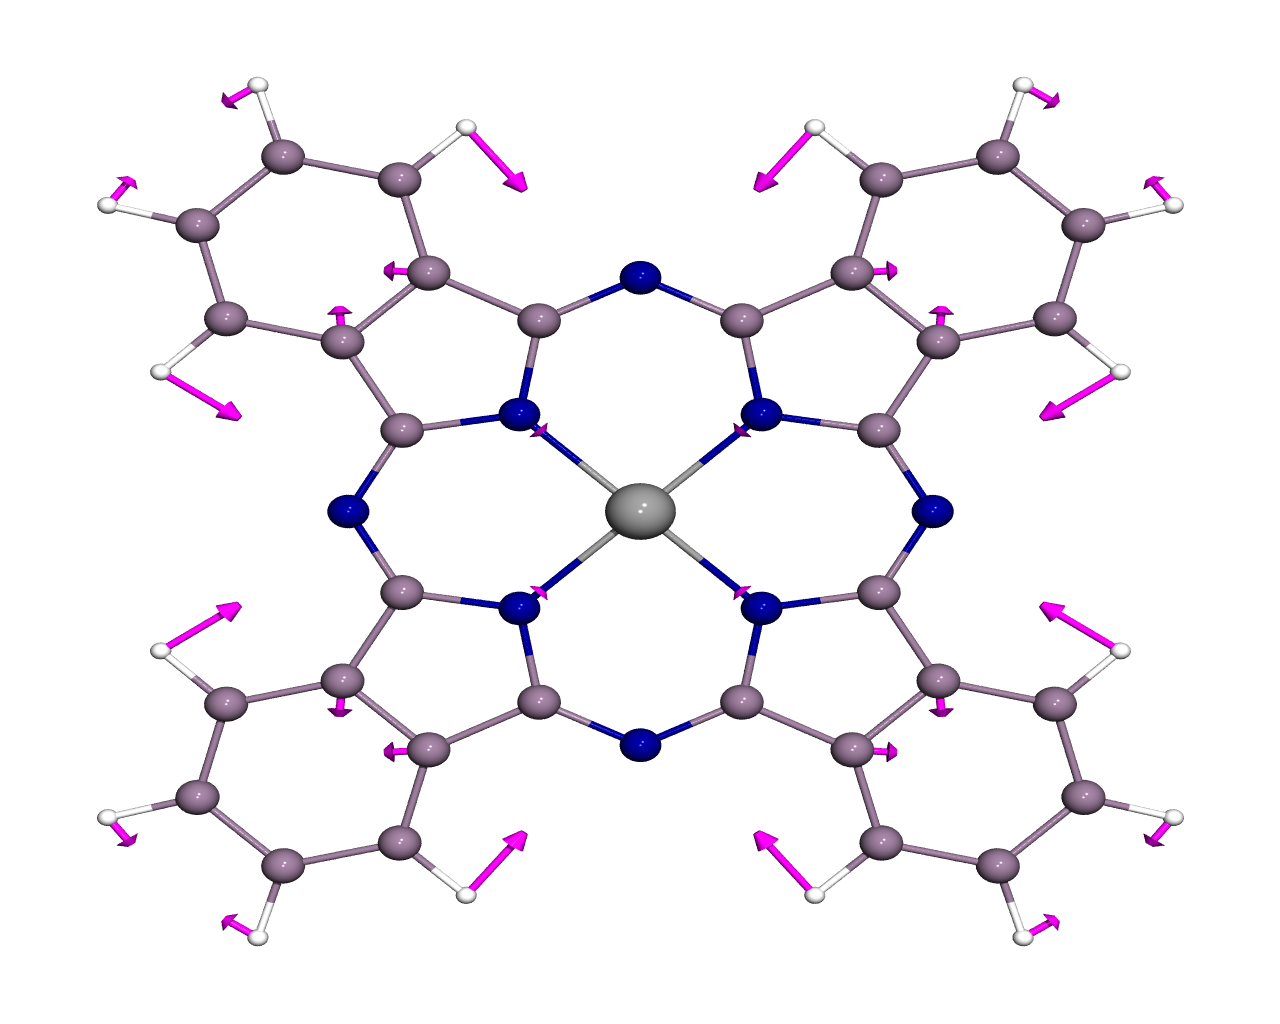
**

**1112 cm‑1**

**Figure S1 Vector diagrams for the major A1 vibrations of zinc phthalocyanine.**

**
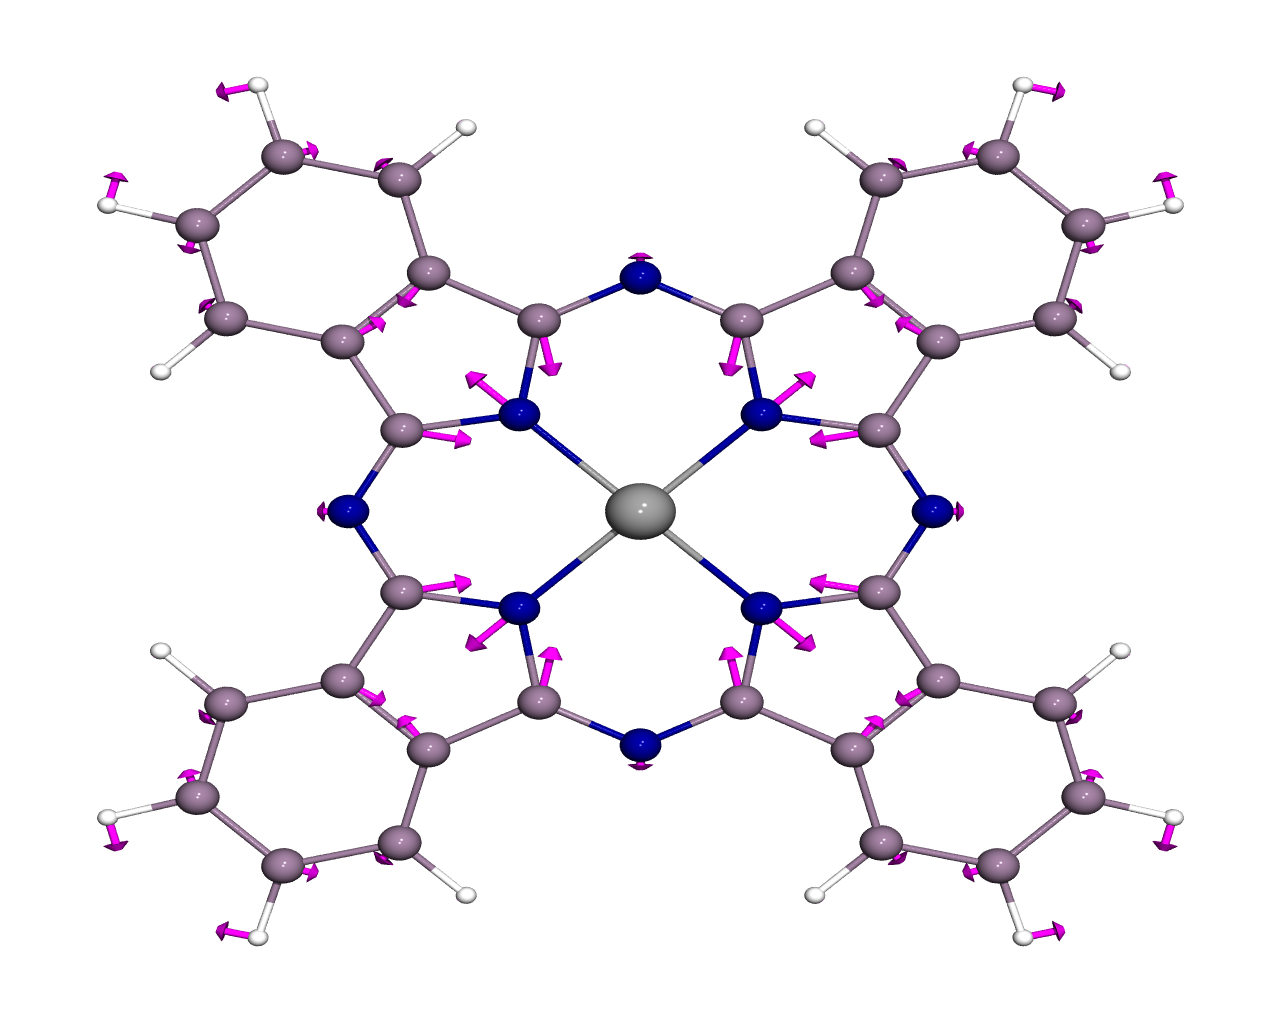
**

**1332 cm‑1**

**
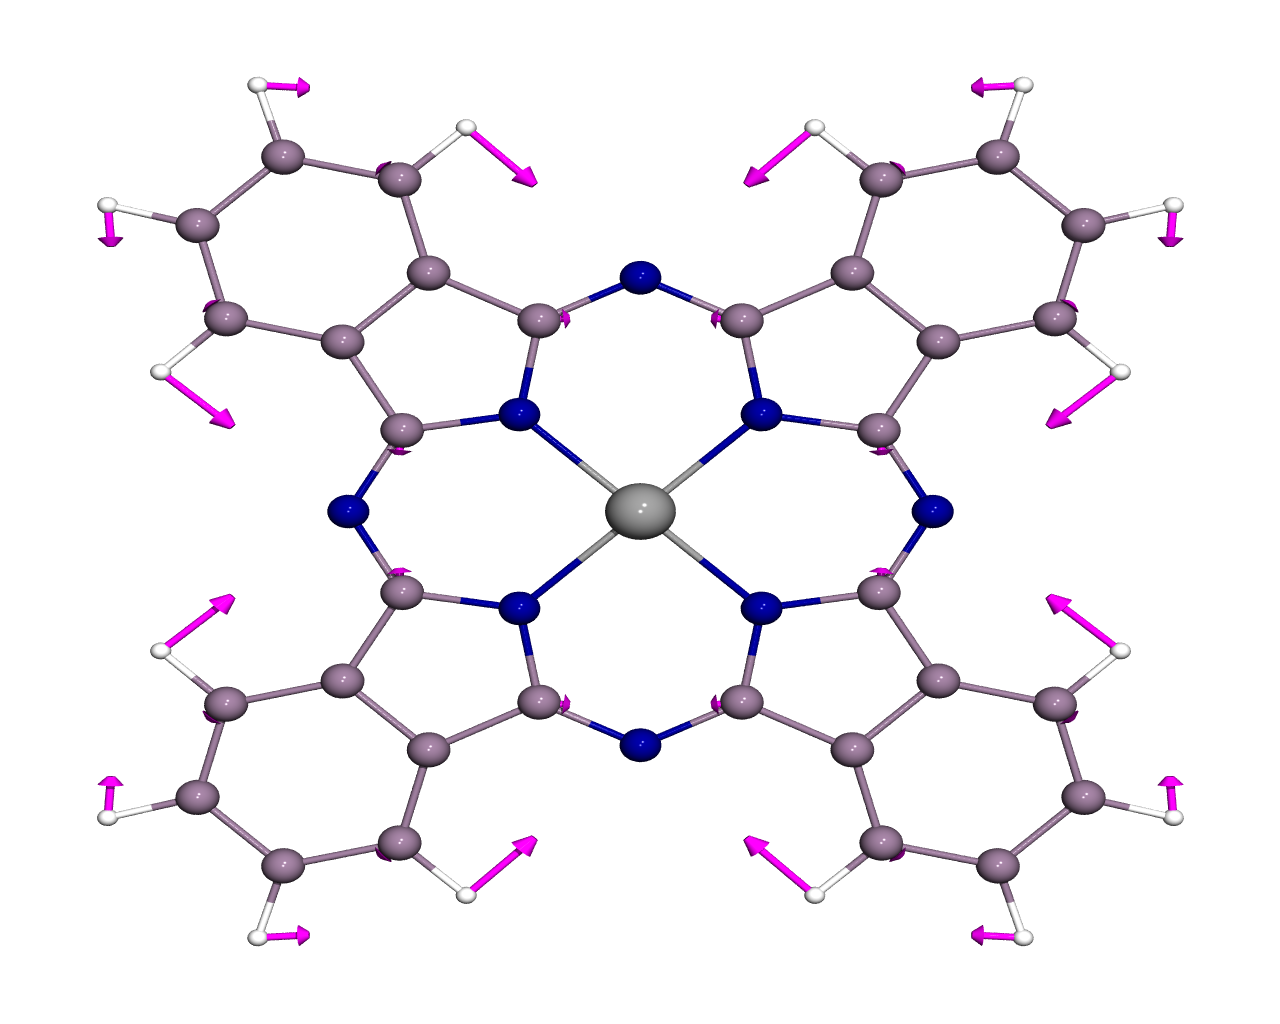
**

**1417 cm‑1**

**Figure S1 Vector diagrams for the major A1 vibrations of zinc phthalocyanine.**

**
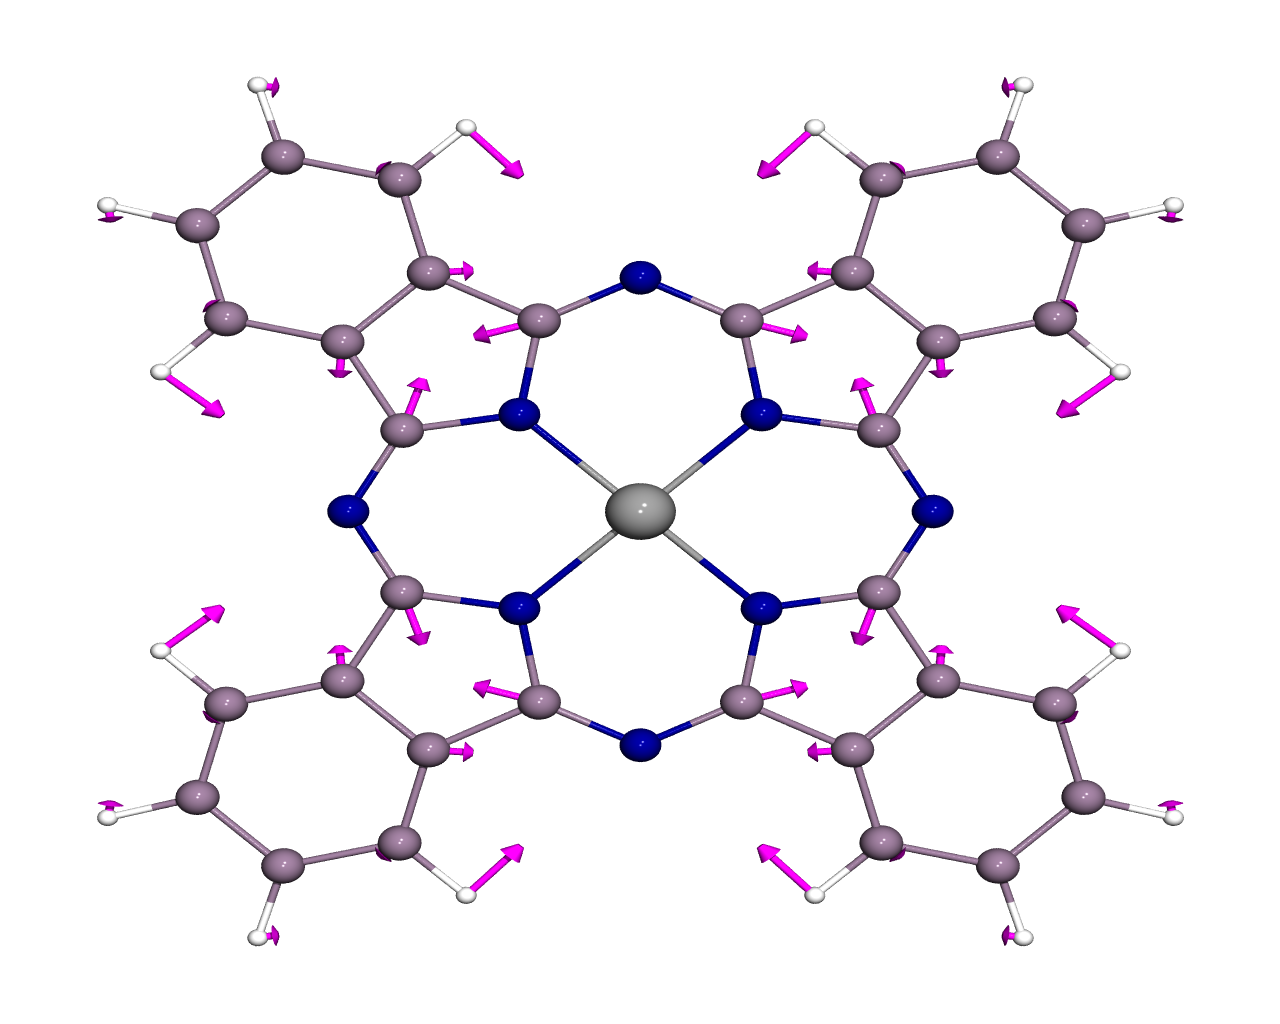
**

**1483 cm‑1**

**Figure S1 Vector diagrams for the major A1 vibrations of zinc phthalocyanine.**

**
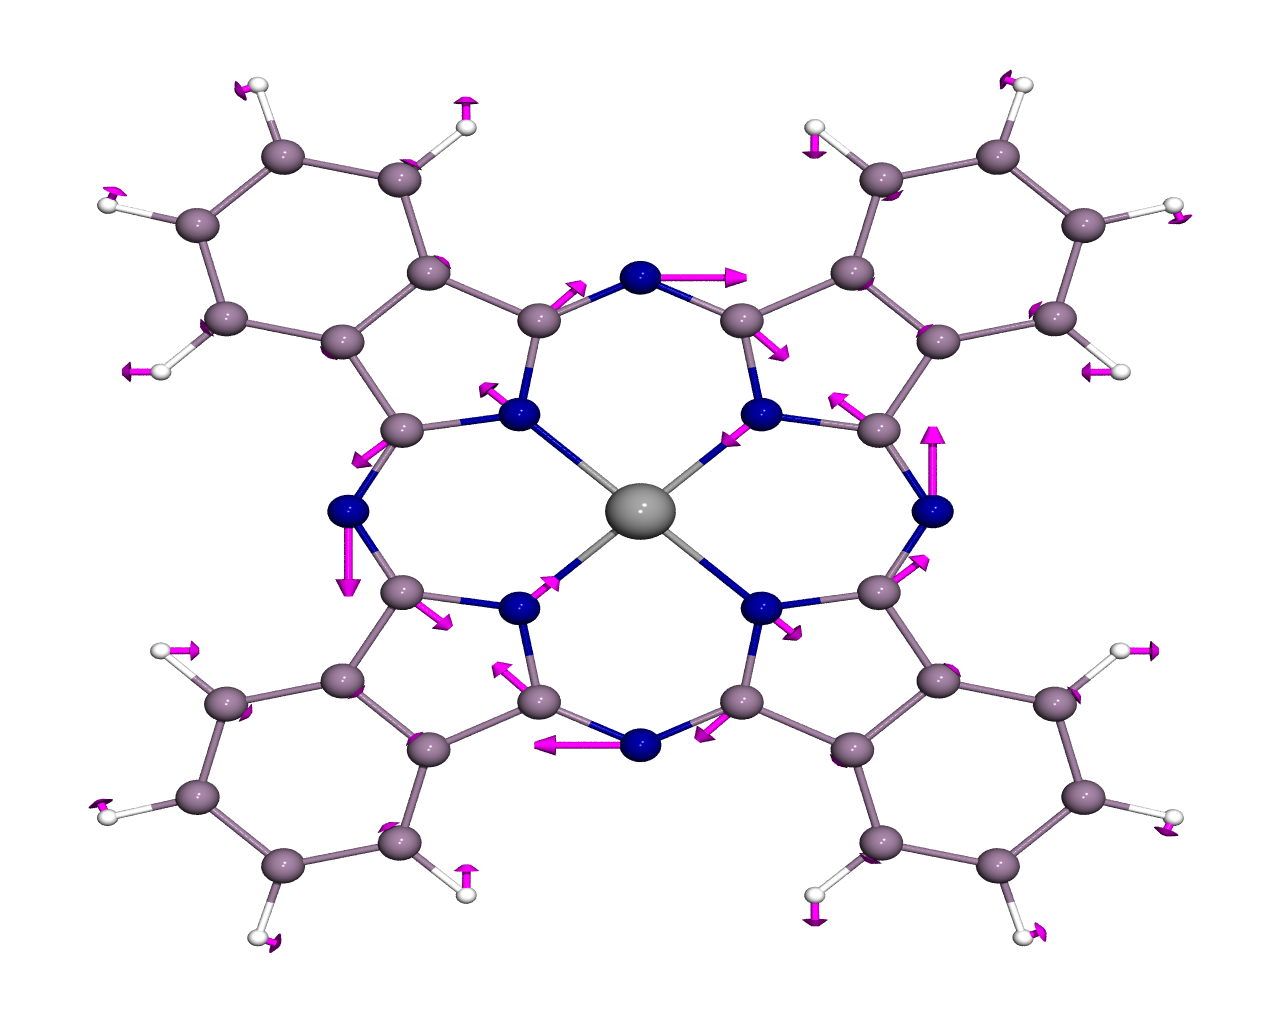
**

**735 cm‑1**

**
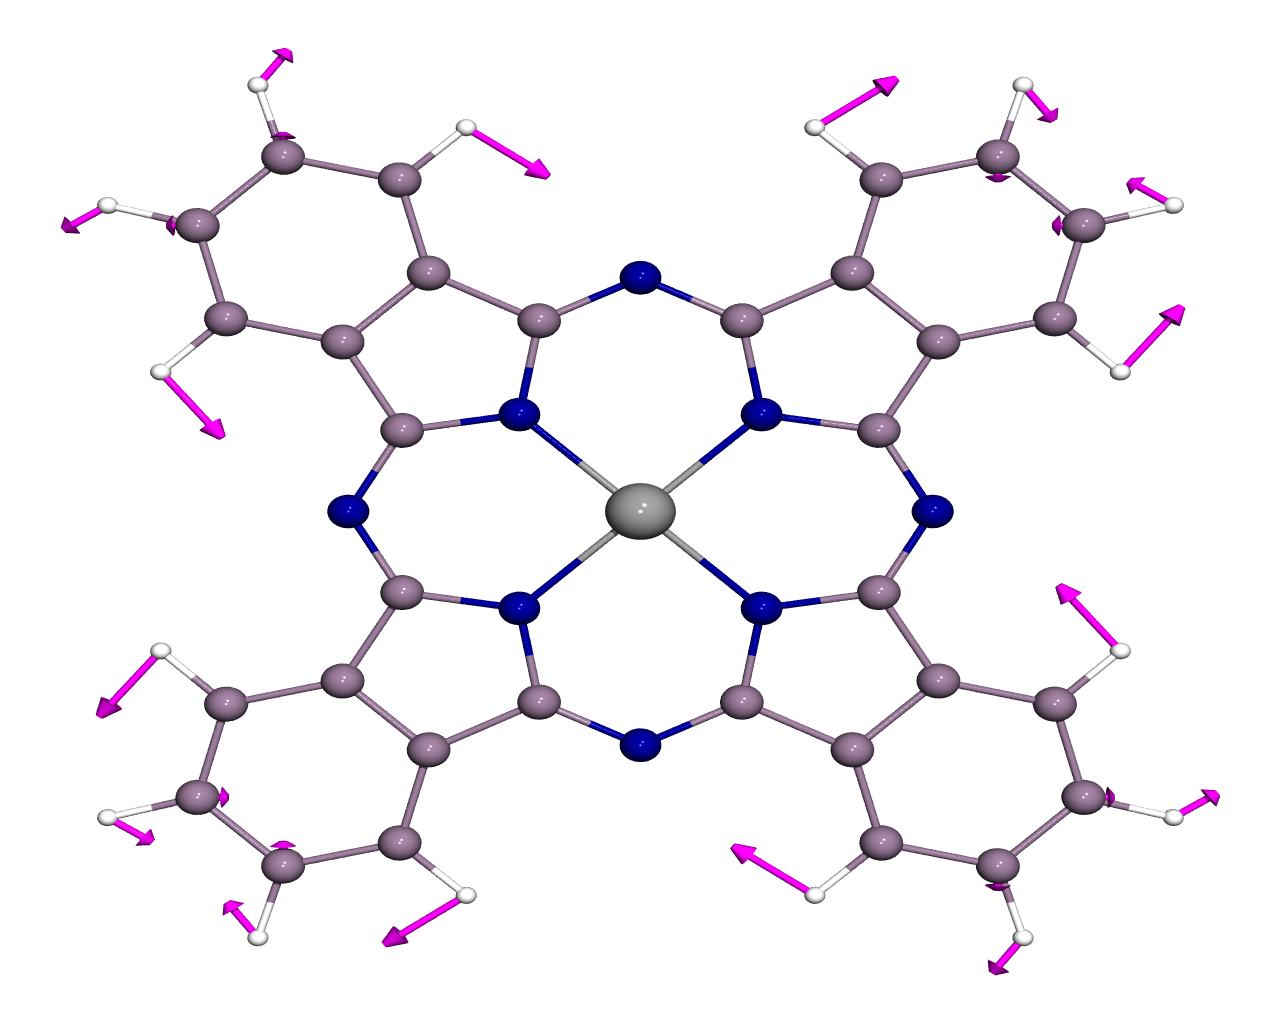
**

**1004 cm‑1**

**Figure S2 Vector diagrams for the major B1 vibrations of zinc phthalocyanine.**

**
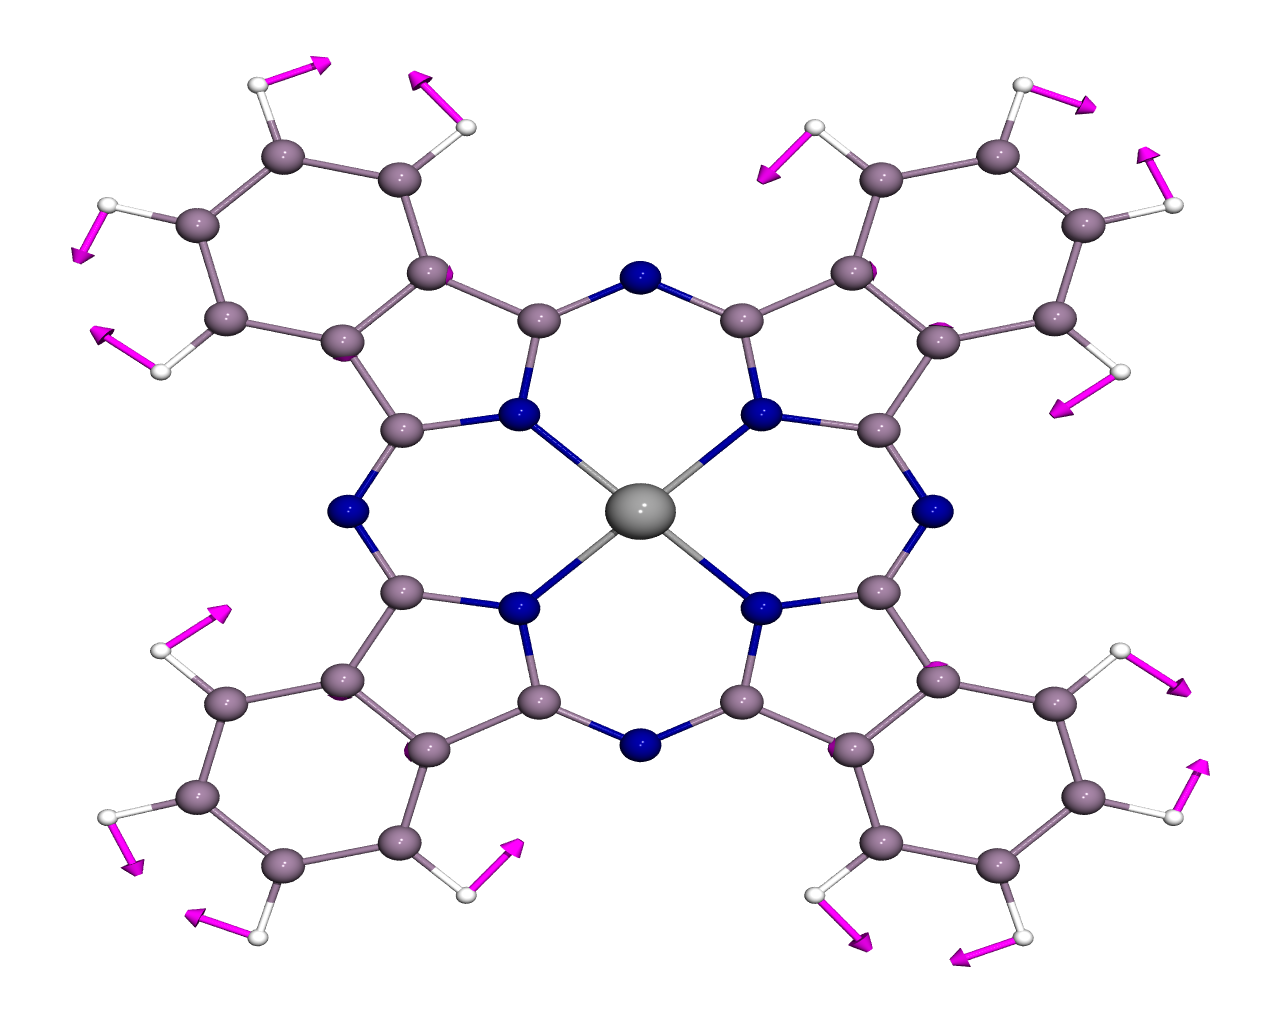
**

**1134 cm‑1**

**
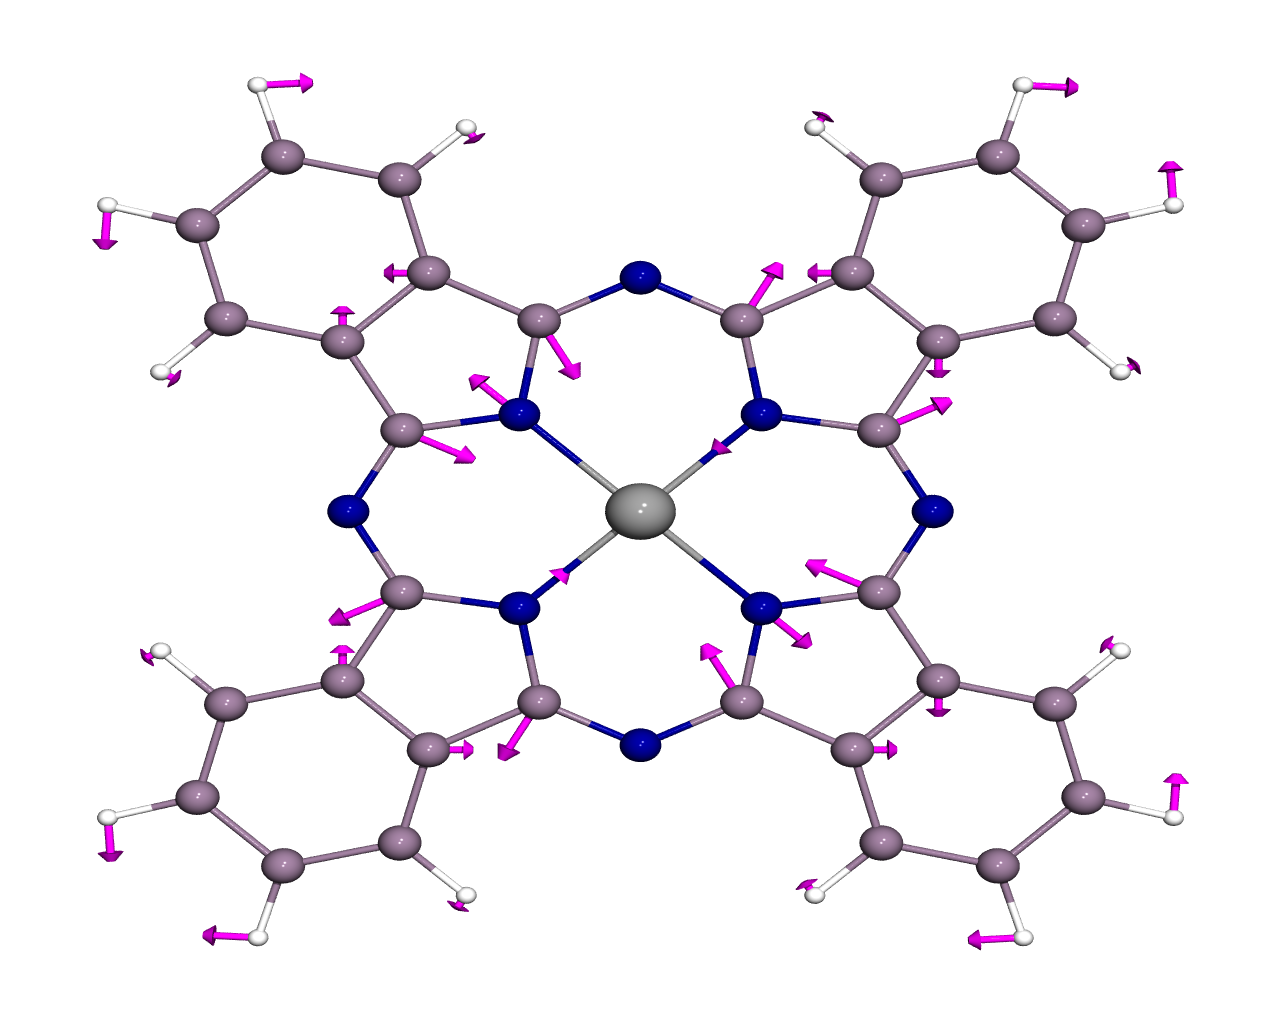
**

**1278 cm‑1**

**Figure S2 Vector diagrams for the major B1 vibrations of zinc phthalocyanine.**

**
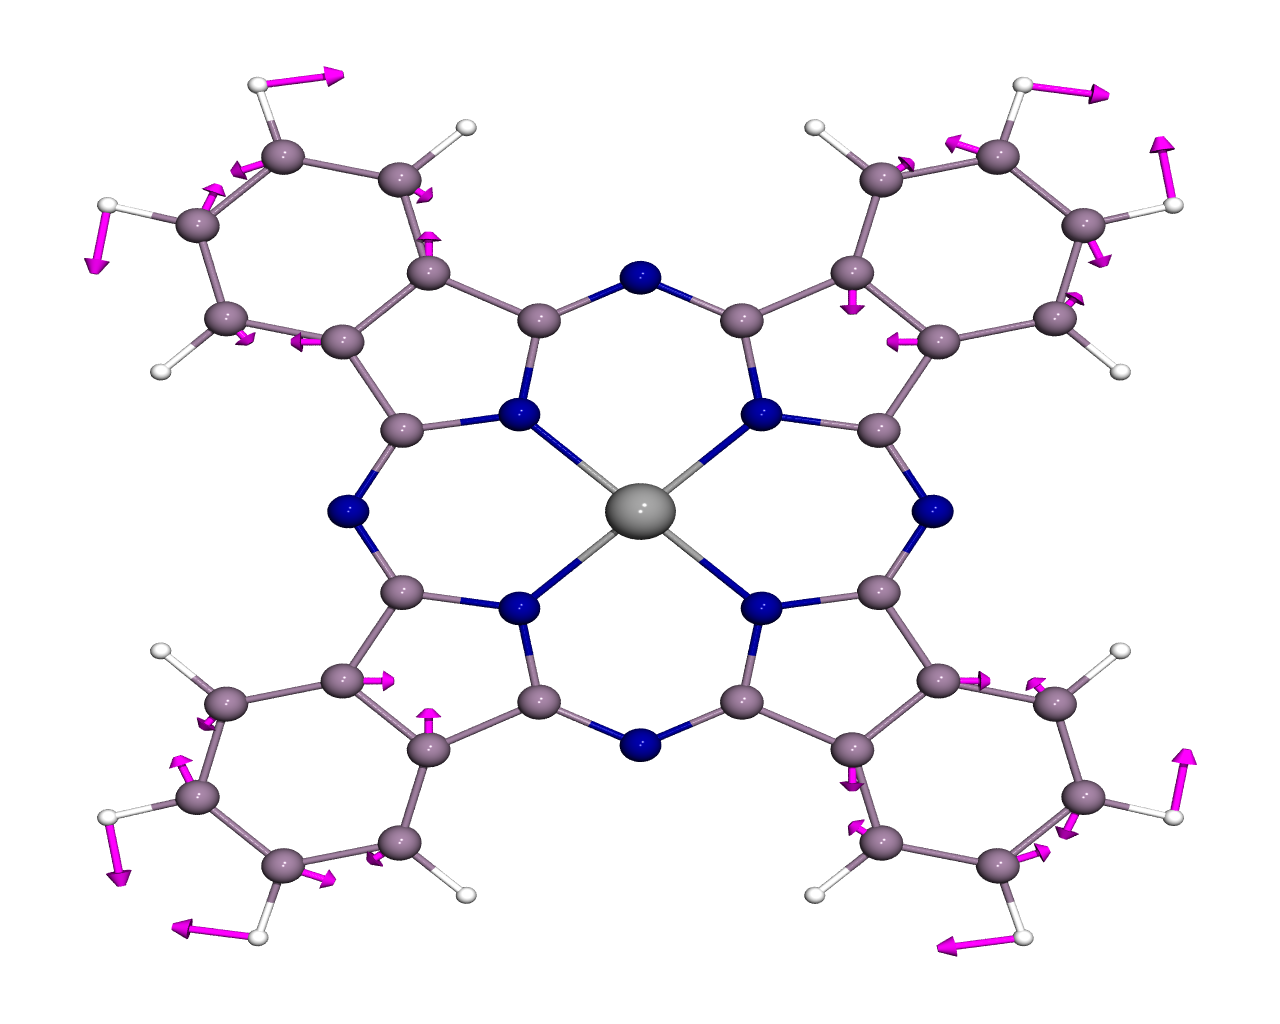
**

**1362 cm‑1**

**
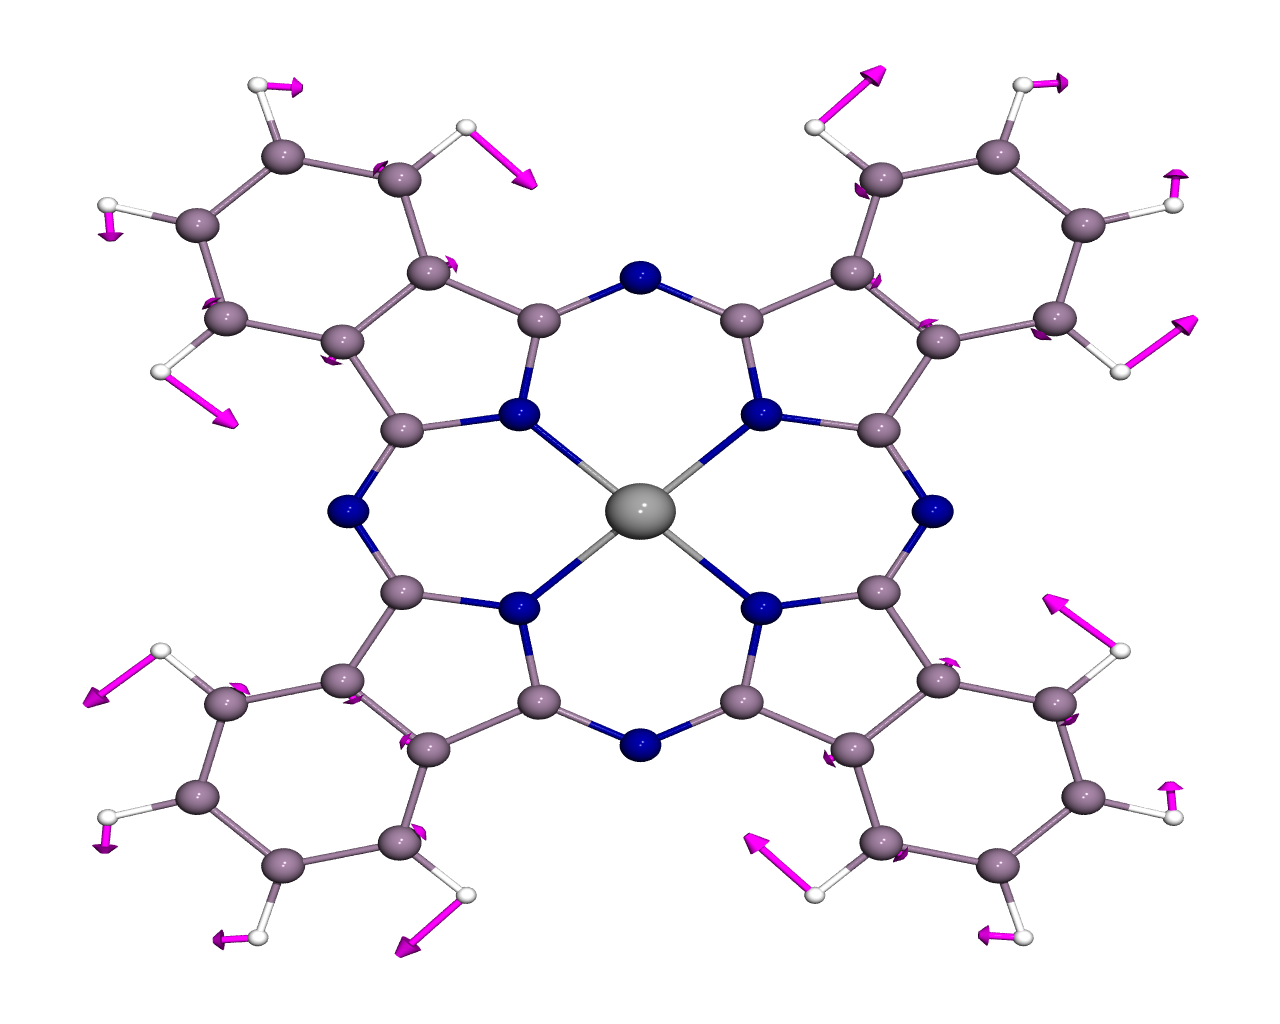
**

**1438 cm‑1**

**Figure S2 Vector diagrams for the major B1 vibrations of zinc phthalocyanine.**

**
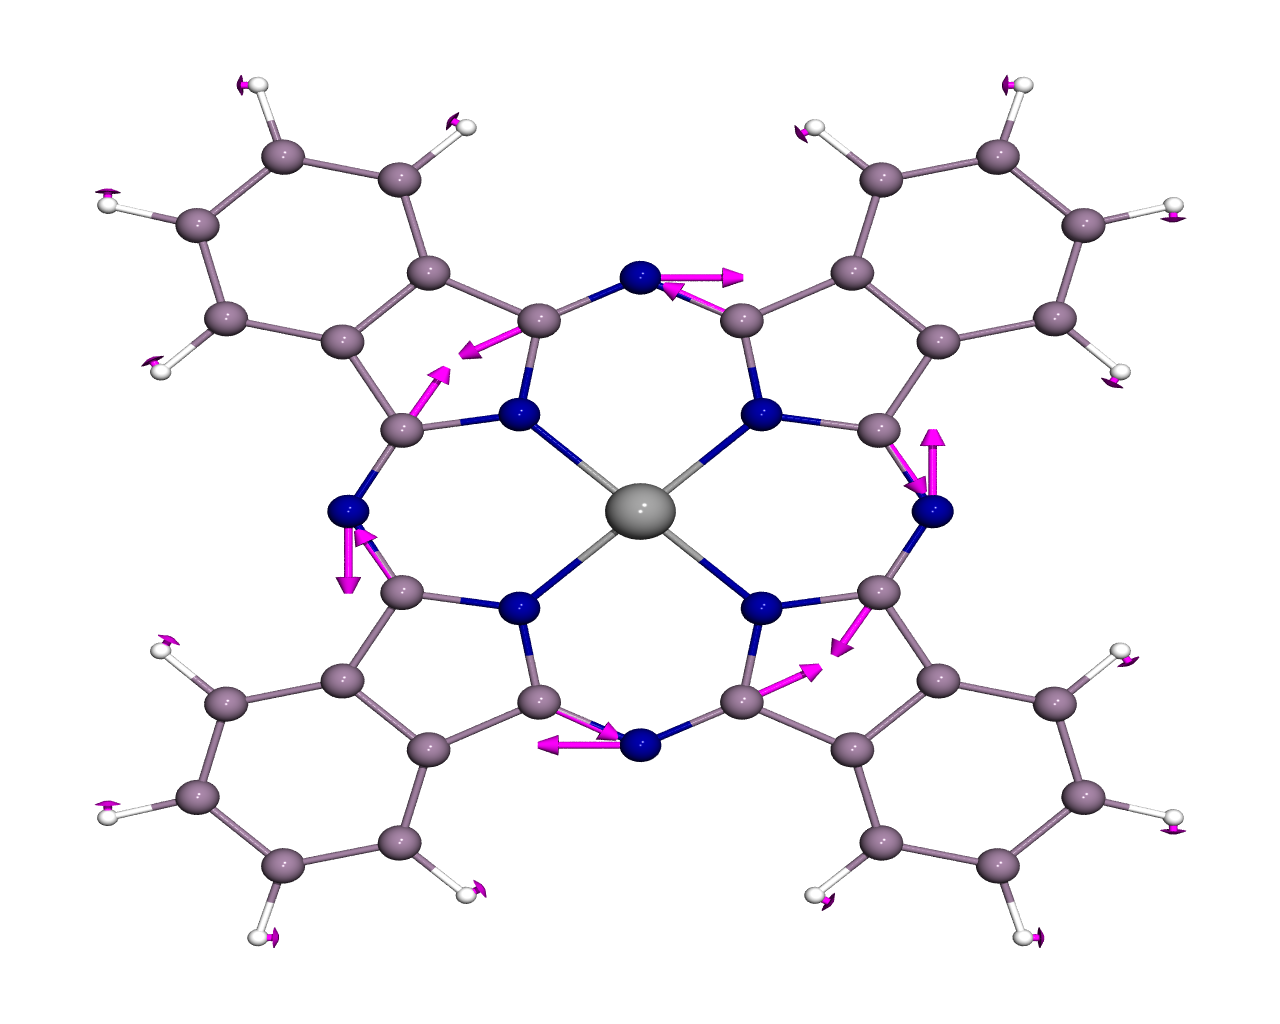
**

**1517 cm‑1**

**Figure S2 Vector diagrams for the major B1 vibrations of zinc phthalocyanine.**

**
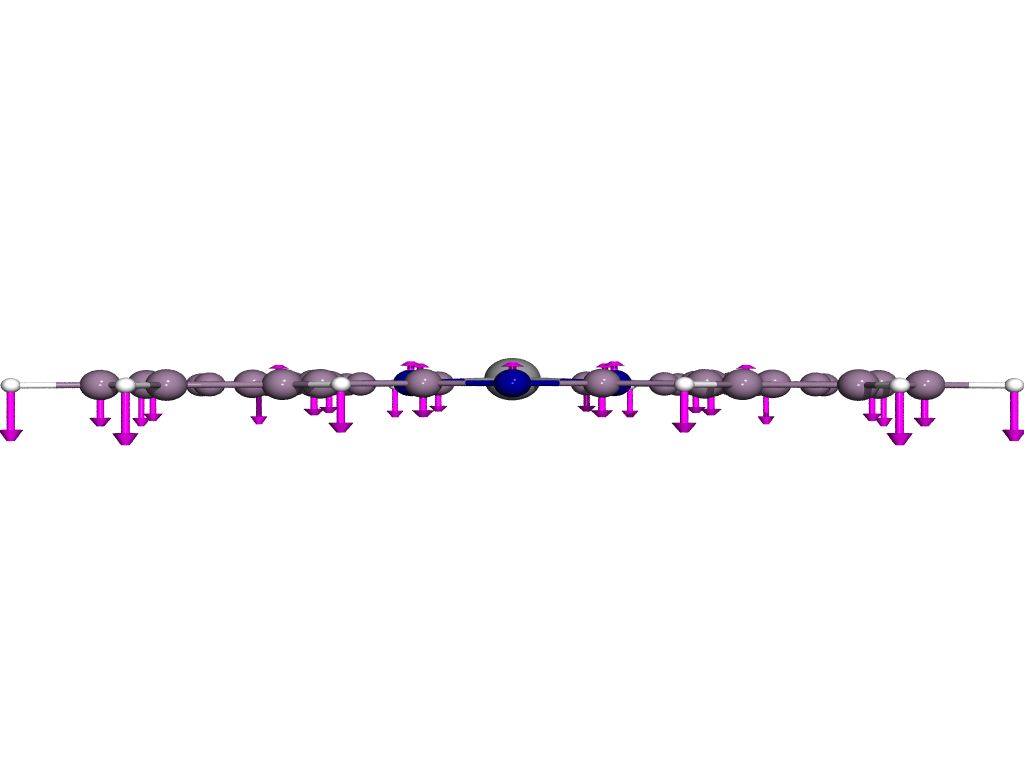
**

**703 cm‑1**

**
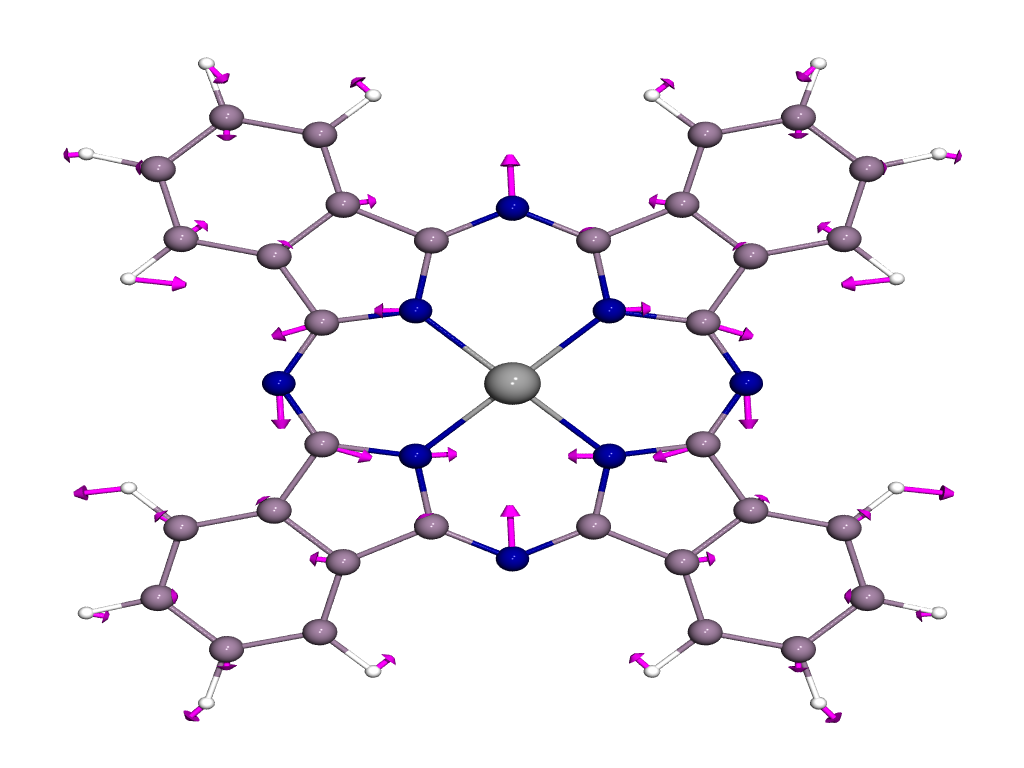
**

**741 cm‑1**

**
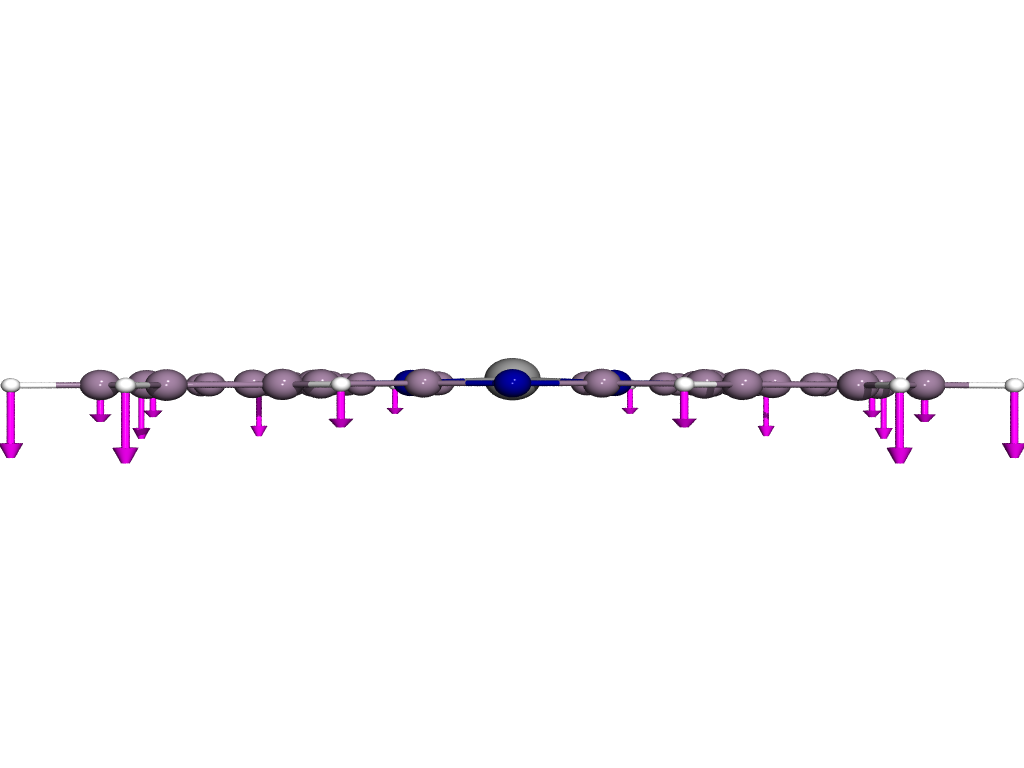
**

**760 cm‑1**

Figure S3 Vector diagrams for the three infrared vibrations of zinc phthalocyanine used for identifying different polymorphic forms.
